# Supplementary material for: MRSA Transmission on a Neonatal Intensive Care Unit: Epidemiological and Genome-Based Phylogenetic Analyses
Source: PLoS One. 2013 Jan 31;8(1):e54898. doi: 10.1371/journal.pone.0054898 (PMC3561456; doi:10.1371/journal.pone.0054898)
Supplement: Figure S3 — Chart indicating room numbers for patients during the case-control study period and their retrospective MRSA status. Colour-filled squares indicate days when infants were MRSA-positive, and colours indicate wards (yellow, red, and blue for wards A, B, and C, respectively). Empty squares without numbers indicate days when infants were not registered on any of the three wards. The table on the left indicates which patients were included in the case-control study. (This figure is meant to be looked at on screen, where it can be zoomed). (XLS) [file pone.0054898.s003.xls]

## Sheet: Suppl. Figure_bunt
		1	2	3	4	5	6	7	8	9	10	11	12	13	14	15	16	17	18	19	20	21	22	23	24	25	26	27	28	1	2	3	4	5	6	7	8	9	10	11	12	13	14	15	16	17	18	19	20
Patient	MRSA isolate														February																												March
1	10-02193		A_4	B_4	B_4	B_4	B_4	C_53	C_53	C_53	C_53	C_53	C_53	C_53	C_53	C_53	C_53	C_53	C_53	C_53	C_53	C_53	C_53	C_53	C_53	C_53	C_53	C_53	C_53	C_53	C_53	C_53	C_53
2	10-02192					A_3	A_3	A_3	A_3	B_5	B_5	B_5	B_5	B_5	B_5	B_7	B_7	B_7	B_7	B_7	B_7	B_7	B_7	B_6	B_6	B_6	B_6	B_6	B_2
3	10-02191									A_3	A_3	A_3	A_3	A_3	A_3	A_3	A_3	A_3	A_3	A_3	A_3	A_3	A_3	A_3	A_3	A_3	A_3	A_3	A_3
4	10-02190	A_5	A_5	A_5	A_5	A_5	A_5	A_5	A_5	A_5	A_5	A_5	A_5	A_5	A_5	A_5	A_5	A_5	A_5	A_5	A_5	A_5	A_5	A_5	A_5	A_5	A_5	A_5	A_5	A_5	A_5	A_5	A_5	A_5	A_5	A_5	A_5	A_5	A_5	A_5	A_5	A_5	A_5	A_5	A_5	A_5	A_5	A_5	A_5
5	10-02196	A_6	A_5	A_5	A_5	A_5	A_5	A_5	A_5	A_5	A_5	A_5	A_5	A_5	A_5	A_5	A_5	A_5	A_5	A_5	A_5	A_5	A_5	A_5	A_5	A_5	A_5	A_5	A_5	A_5	A_5	A_5	A_5	A_5	A_5	A_5	B_2	B_2	B_2	B_2	B_2	B_2	B_2	B_2	B_2	B_2	B_2	B_2	B_2
6	10-02189							A_2	A_2	B_5	B_5	B_5	B_5	B_5	B_5	B_5	B_5	B_5	B_5	B_5	B_5	B_5	B_5	B_5	B_5	B_5	B_5	B_5	B_5	B_5	B_5	B_5	B_5	B_5	B_5	B_5	B_5	B_5	B_5	B_5	B_5	B_5	B_5	B_5	B_5	B_5	B_5	B_5	B_5
7	10-02187	A_4	B_4	B_4	B_4	B_4	B_4	B_4	B_4	B_4	B_4	B_4	B_4	B_4	B_4	B_4	B_4	B_4	B_4	B_4	B_4	B_4	B_4	B_4	B_4	B_4	B_4	B_4	B_4	B_4	B_4	B_2	B_2	B_2	B_2	B_2	B_2	B_2	B_2	B_2	B_2	B_2	B_2	B_2	B_2	B_2	B_2	B_2	B_2
8	10-02188																									A_6	A_6	A_6	A_6	A_6	A_6	A_6	A_6	A_6	A_6	A_6	A_6
9	10-02180																											A_4	A_4	A_4	A_4	A_4	A_4	A_4	A_4	A_4	A_4	A_4	A_4	A_4	A_4	A_4	A_4	A_4	A_4	A_4	A_4	A_4	A_4
10	10-02186																														B_4	B_4	B_4	C_53	C_53	C_53	C_53	C_53	C_53	C_53	C_53	C_53	C_53	C_53	C_53	C_53	C_53	C_53	C_53
11	10-02184
12	10-02185
13	10-02183
14	10-02182	A_2	A_2	A_2	A_2	A_2	A_2	A_2	A_2	A_2	A_2	A_2	A_2	A_2	A_2	A_2	A_2	A_2	A_2	A_2	A_2	A_2	A_2	A_2	A_2	A_2	A_2	A_2	B_5	B_5	B_5	B_5	B_5	B_5	B_5	B_5	B_5	B_5	B_5	B_5	B_5	B_5	B_5	B_5	B_5	B_5	B_5	B_5	B_5
15	10-02173
16	10-02179
17	10-02177
18	10-02178
19	10-02176
20	10-02174
21	10-02175
22	10-02172
23	10-02171
24	10-02168
25	10-02163
26	10-02166
27	10-02169
28	10-02170
29	10-02165
30	10-02161
31	10-02164
32	10-02162
Figure S3
[truncated: 164 more columns]
