# Supplementary material for: MRSA Transmission on a Neonatal Intensive Care Unit: Epidemiological and Genome-Based Phylogenetic Analyses
Source: PubMed Central journal article supplement (PMC3561456; doi:10.1371/journal.pone.0054898), 2013-01-31

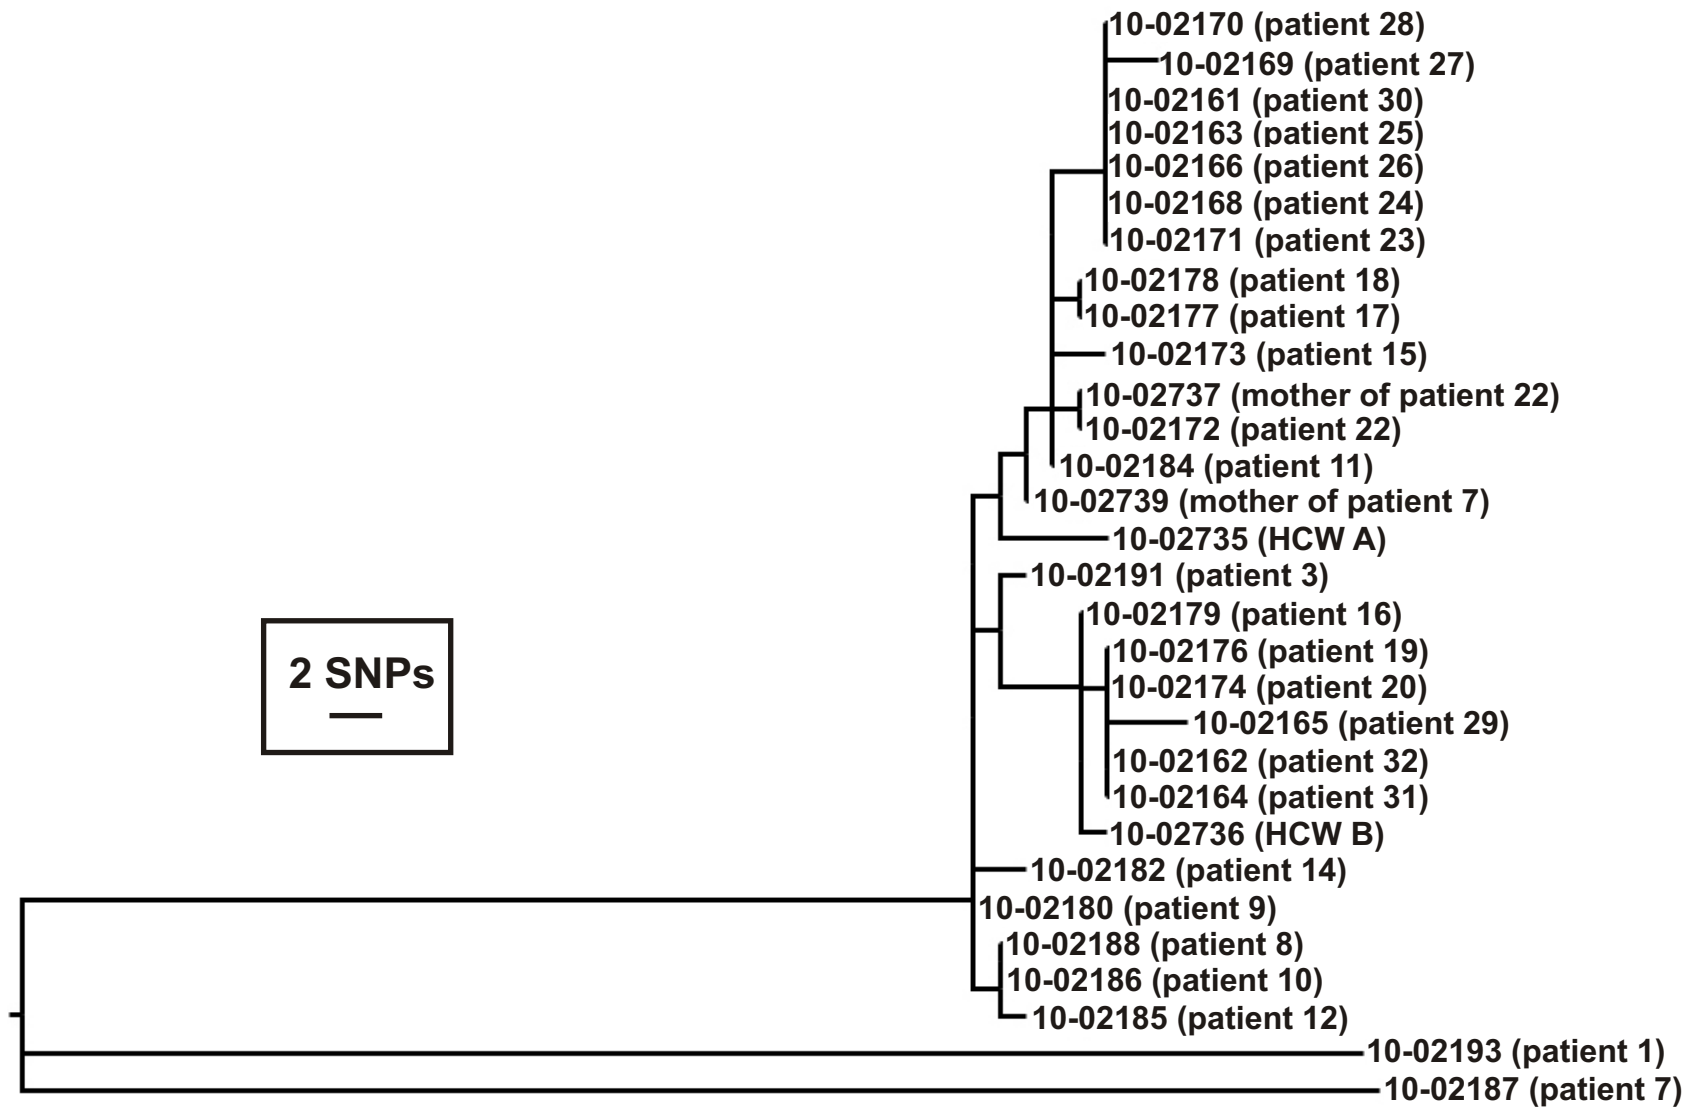

Supplement: pone.0054898.s001.pdf [file pone.0054898.s001.pdf]
